# Supplementary material for: Pickering emulsions stabilized by coloured organic pigment particles
Source: PubMed Central journal article supplement (PMC5465566; doi:10.1039/c6sc03085h), 2016-09-19

## ESI

### **Pickering Emulsions Stabilized by Coloured Organic Pigment Particles**

Bernard P. Binks\* and Samuel O. Olusanya

*Department of Chemistry, University of Hull, Hull HU6 7RX, U.K.*

**Table S1.** Elemental composition of the seven pure pigments.

| Element   | Composition/wt.% |       |       |       |       |       |       |
|-----------|------------------|-------|-------|-------|-------|-------|-------|
|           | PR               | PO    | PY    | PG    | PB    | PI    | PV    |
| <b>C</b>  | 55.68            | 43.55 | 50.88 | 39.85 | 61.29 | 63.06 | 72.74 |
| <b>O</b>  | 26.51            | 25.40 | 11.92 | 0.91  | 0.63  | 21.26 | 13.77 |
| <b>N</b>  | 17.71            | 31.04 | 6.63  | 13.30 | 24.30 | 15.47 | 13.28 |
| <b>S</b>  | 0.04             | 0.00  | 0.02  | 0.08  | 0.00  | 0.00  | 0.14  |
| <b>Cl</b> | 0.06             | 0.00  | 30.53 | 42.10 | 3.20  | 0.21  | 0.07  |
| <b>Al</b> | 0.00             | 0.01  | 0.02  | 0.25  | 0.00  | 0.00  | 0.00  |
| <b>Cu</b> | 0.00             | 0.00  | 0.00  | 3.51  | 10.58 | 0.00  | 0.00  |

**Table S2.** Values of the maximum wavelength and absorbance for each pigment (0.1 mg/ml) measured at room temperature in water and *n*-heptane for the unfiltered dispersion and its supernatant.

| Pigment   | <i>n</i> -Heptane          |       |                            |       | Water                      |       |                            |       |
|-----------|----------------------------|-------|----------------------------|-------|----------------------------|-------|----------------------------|-------|
|           | Dispersion                 |       | Supernatant                |       | Dispersion                 |       | Supernatant                |       |
|           | $\lambda_{\max}/\text{nm}$ | Abs.  | $\lambda_{\max}/\text{nm}$ | Abs.  | $\lambda_{\max}/\text{nm}$ | Abs.  | $\lambda_{\max}/\text{nm}$ | Abs.  |
| <b>PR</b> | 600                        | 0.133 | 351                        | 0.106 | 607                        | 0.292 | 364                        | 0.094 |
| <b>PO</b> | 347                        | 0.084 | 351                        | 0.068 | 547                        | 0.406 | 476                        | 0.249 |
| <b>PY</b> | 490                        | 0.022 | 352                        | 0.148 | 479                        | 0.108 | 465                        | 0.062 |
| <b>PG</b> | 675                        | 0.131 | 370                        | 0.048 | 670                        | 0.096 | 370                        | 0.071 |
| <b>PB</b> | 647                        | 0.424 | 410                        | 0.047 | 384                        | 0.177 | 370                        | 0.096 |
| <b>PI</b> | 646                        | 0.084 | 435                        | 0.048 | 660                        | 0.106 | 430                        | 0.075 |
| <b>PV</b> | 610                        | 0.107 | 610                        | 0.039 | 610                        | 0.098 | 590                        | 0.060 |

**Table S3.** Values of apparent extinction coefficient for the seven pigments in water and *n*-heptane.

| Pigment   | <i>n</i> -Heptane                             | Water                                         |
|-----------|-----------------------------------------------|-----------------------------------------------|
|           | $\epsilon/(\text{mg/ml})^{-1} \text{cm}^{-1}$ | $\epsilon/(\text{mg/ml})^{-1} \text{cm}^{-1}$ |
| <b>PR</b> | 2.5                                           | 2.1                                           |
| <b>PO</b> | 0.3                                           | 28                                            |
| <b>PY</b> | 3.4                                           | 1.3                                           |
| <b>PG</b> | 6.7                                           | 2.4                                           |
| <b>PB</b> | 8.3                                           | 2.6                                           |
| <b>PI</b> | 1.2                                           | 0.8                                           |
| <b>PV</b> | 1.0                                           | 1.0                                           |

**Figure S1.** SEM images for the seven pigments at low magnification for (a) PR, (b) PO, (c) PY, (d) PG, (e) PB, (f) PI, (g) PV.

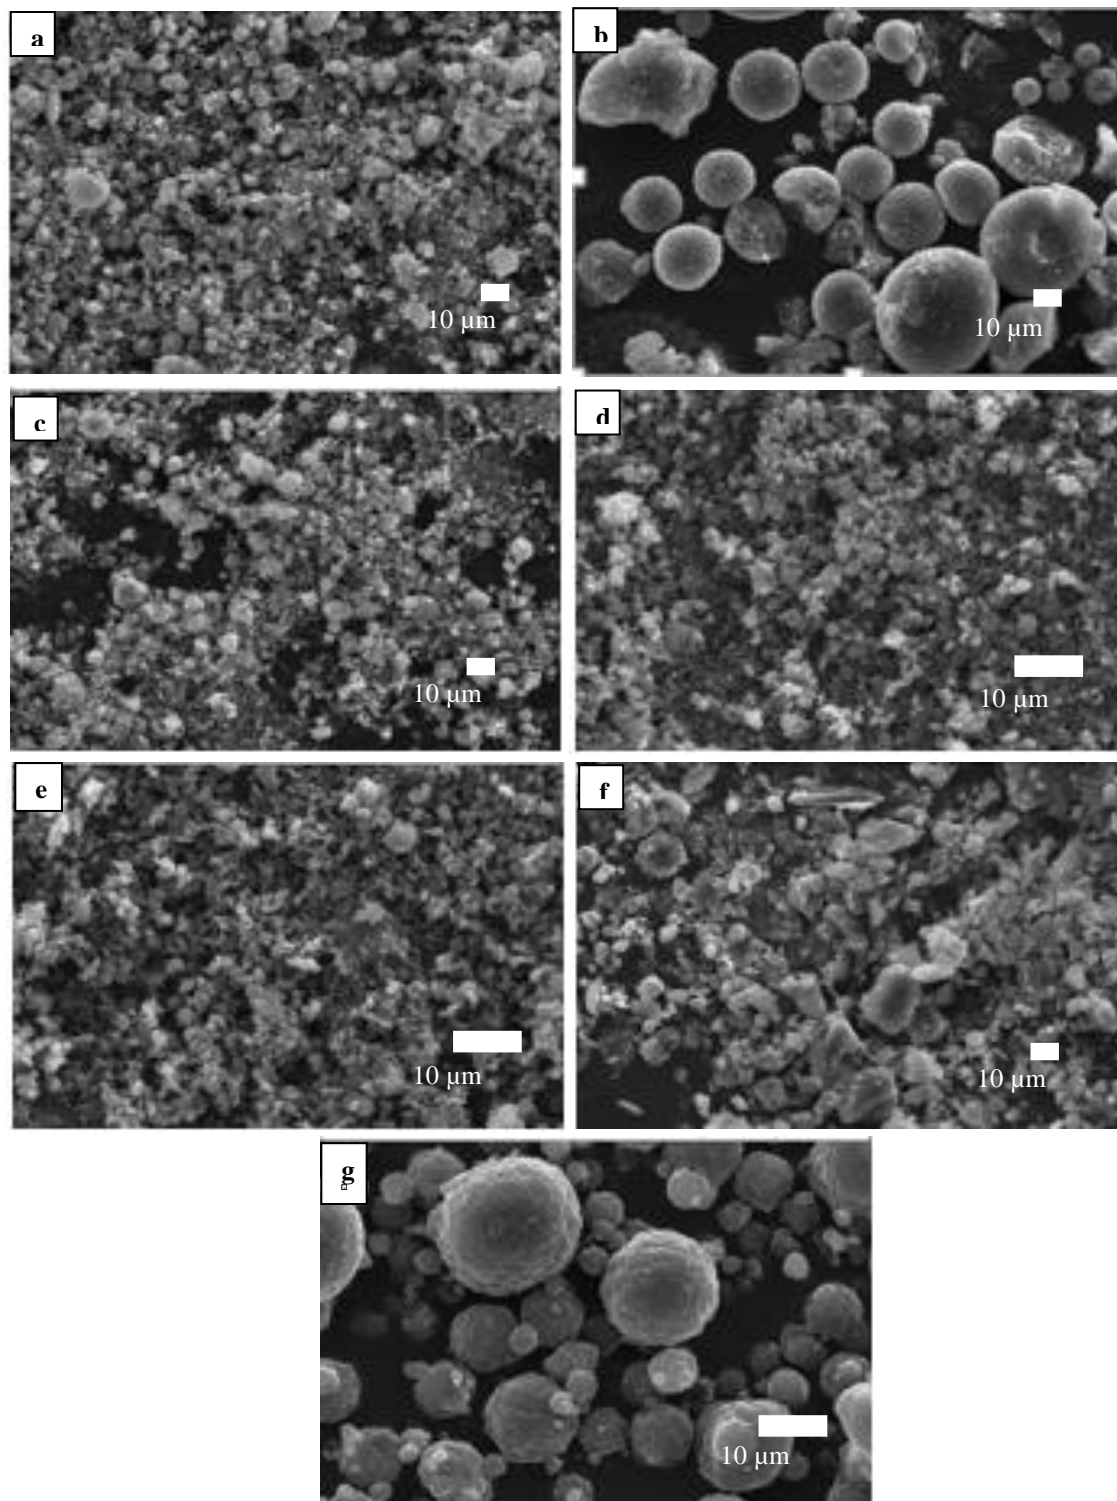

**Figure S2.** EDX spectra for the seven pigments for (a) PR, (b) PO, (c) PY, (d) PG, (e) PB, (f) PI, (g) PV.

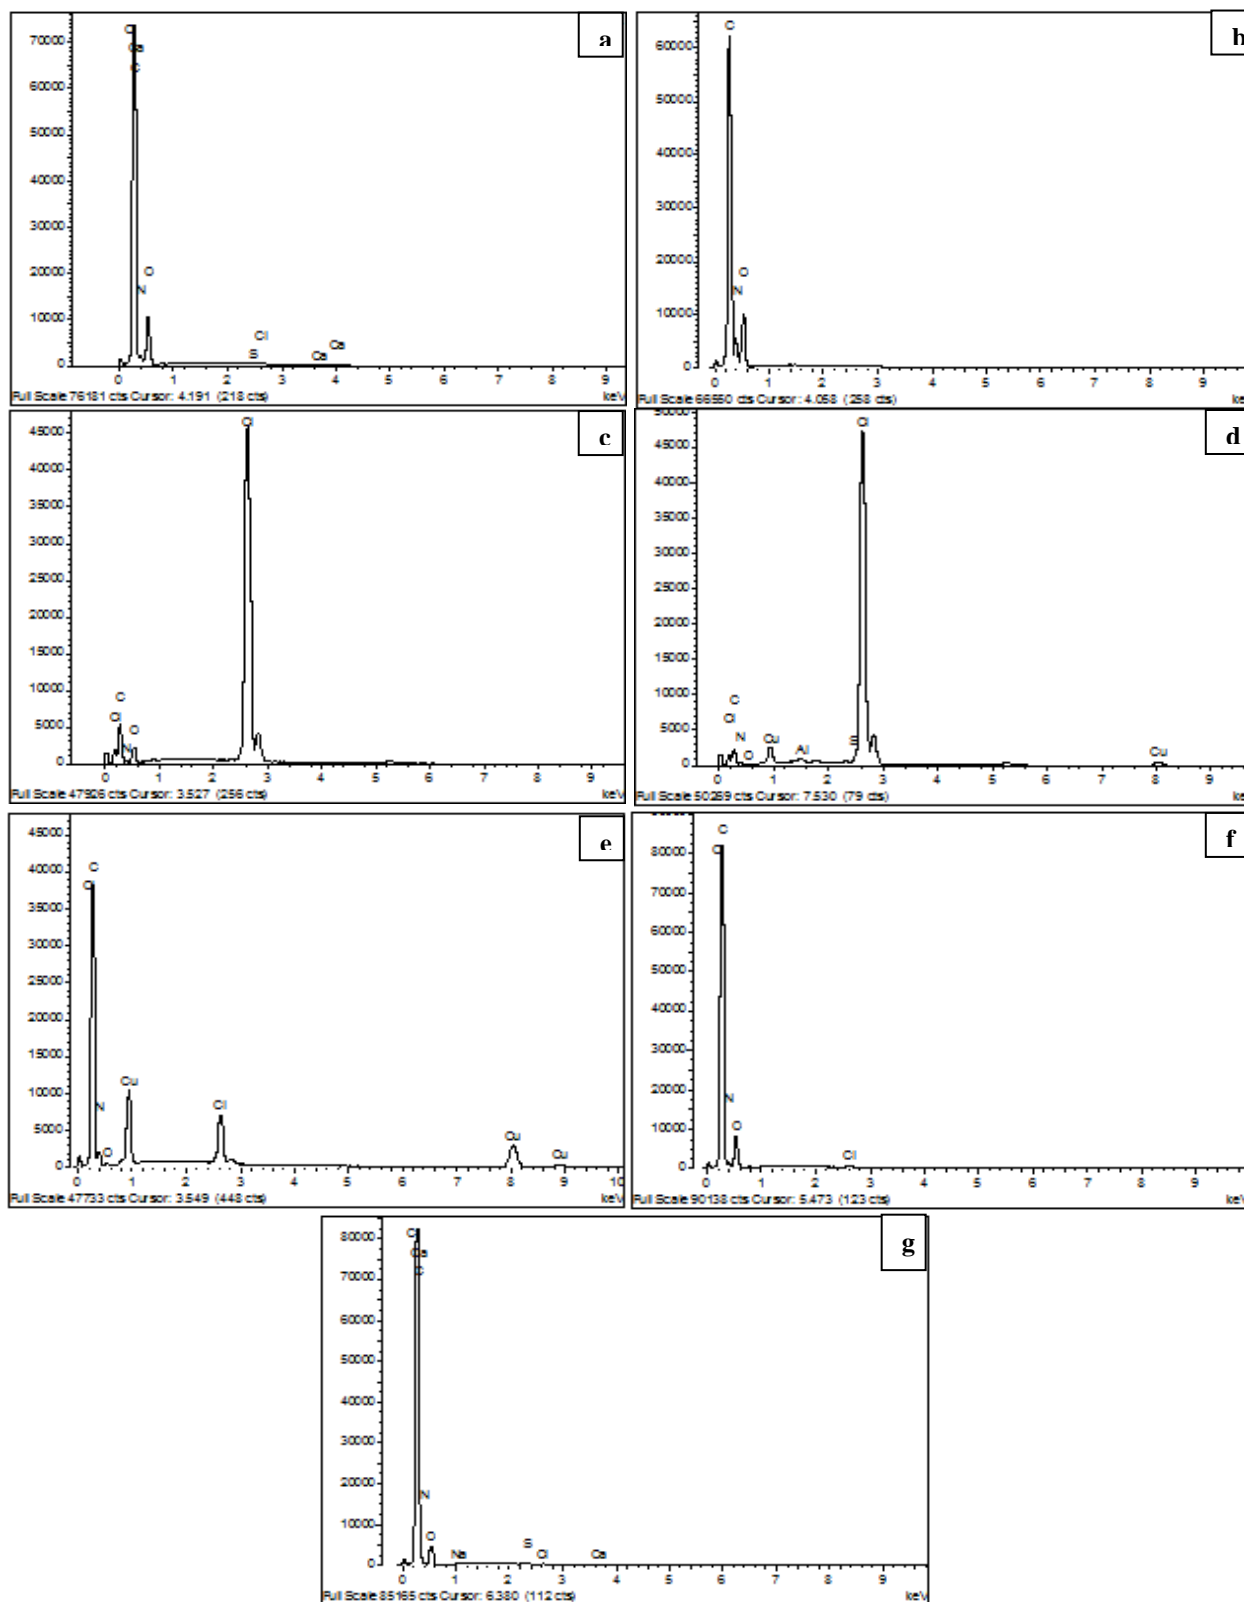

**Figure S3.** 3-D surface energy diagrams for pigment particles determined at various values of  $\gamma_{sa}^d$  and  $\gamma_{sa}^p$  for (a) PY, (b) PG, (c) PB, (d) PI.

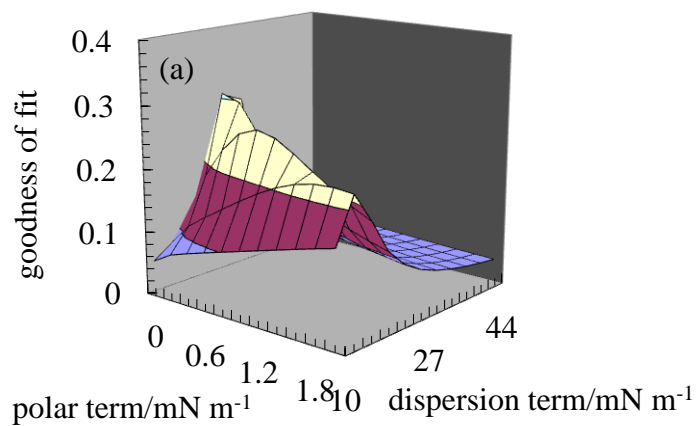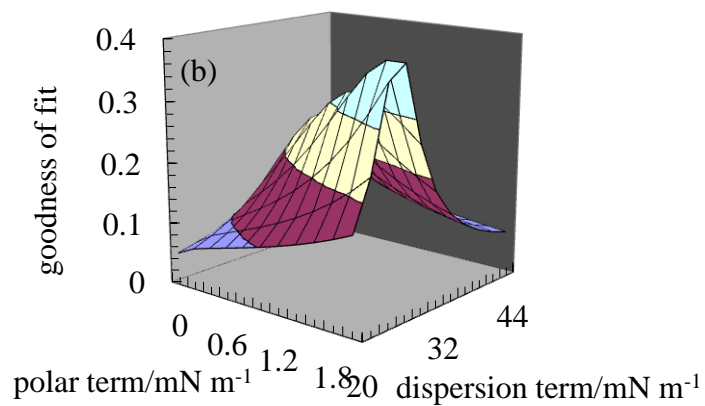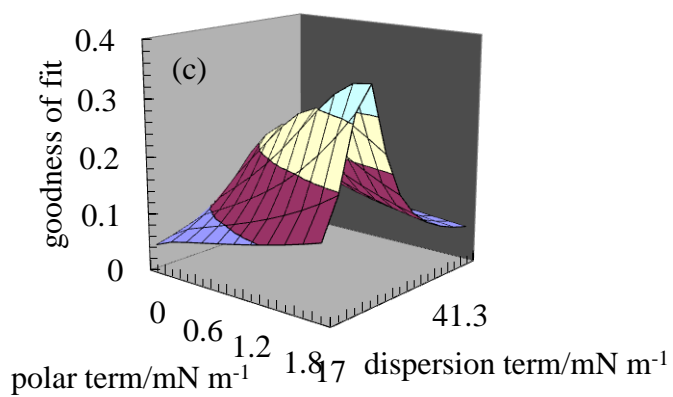

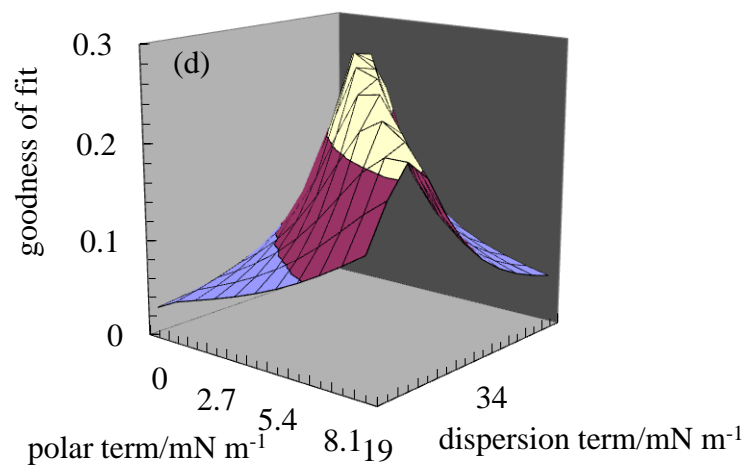

**Figure S4.** Graphs of absorbance against wavelength determined with 0.1 mg/ml of each pigment dispersion and its supernatant in *n*-heptane (left column) and water (right column) for (i) PR, (ii) PO, (iii) PY, (iv) PG, (v) PB, (vi) PI and (vii) PV.

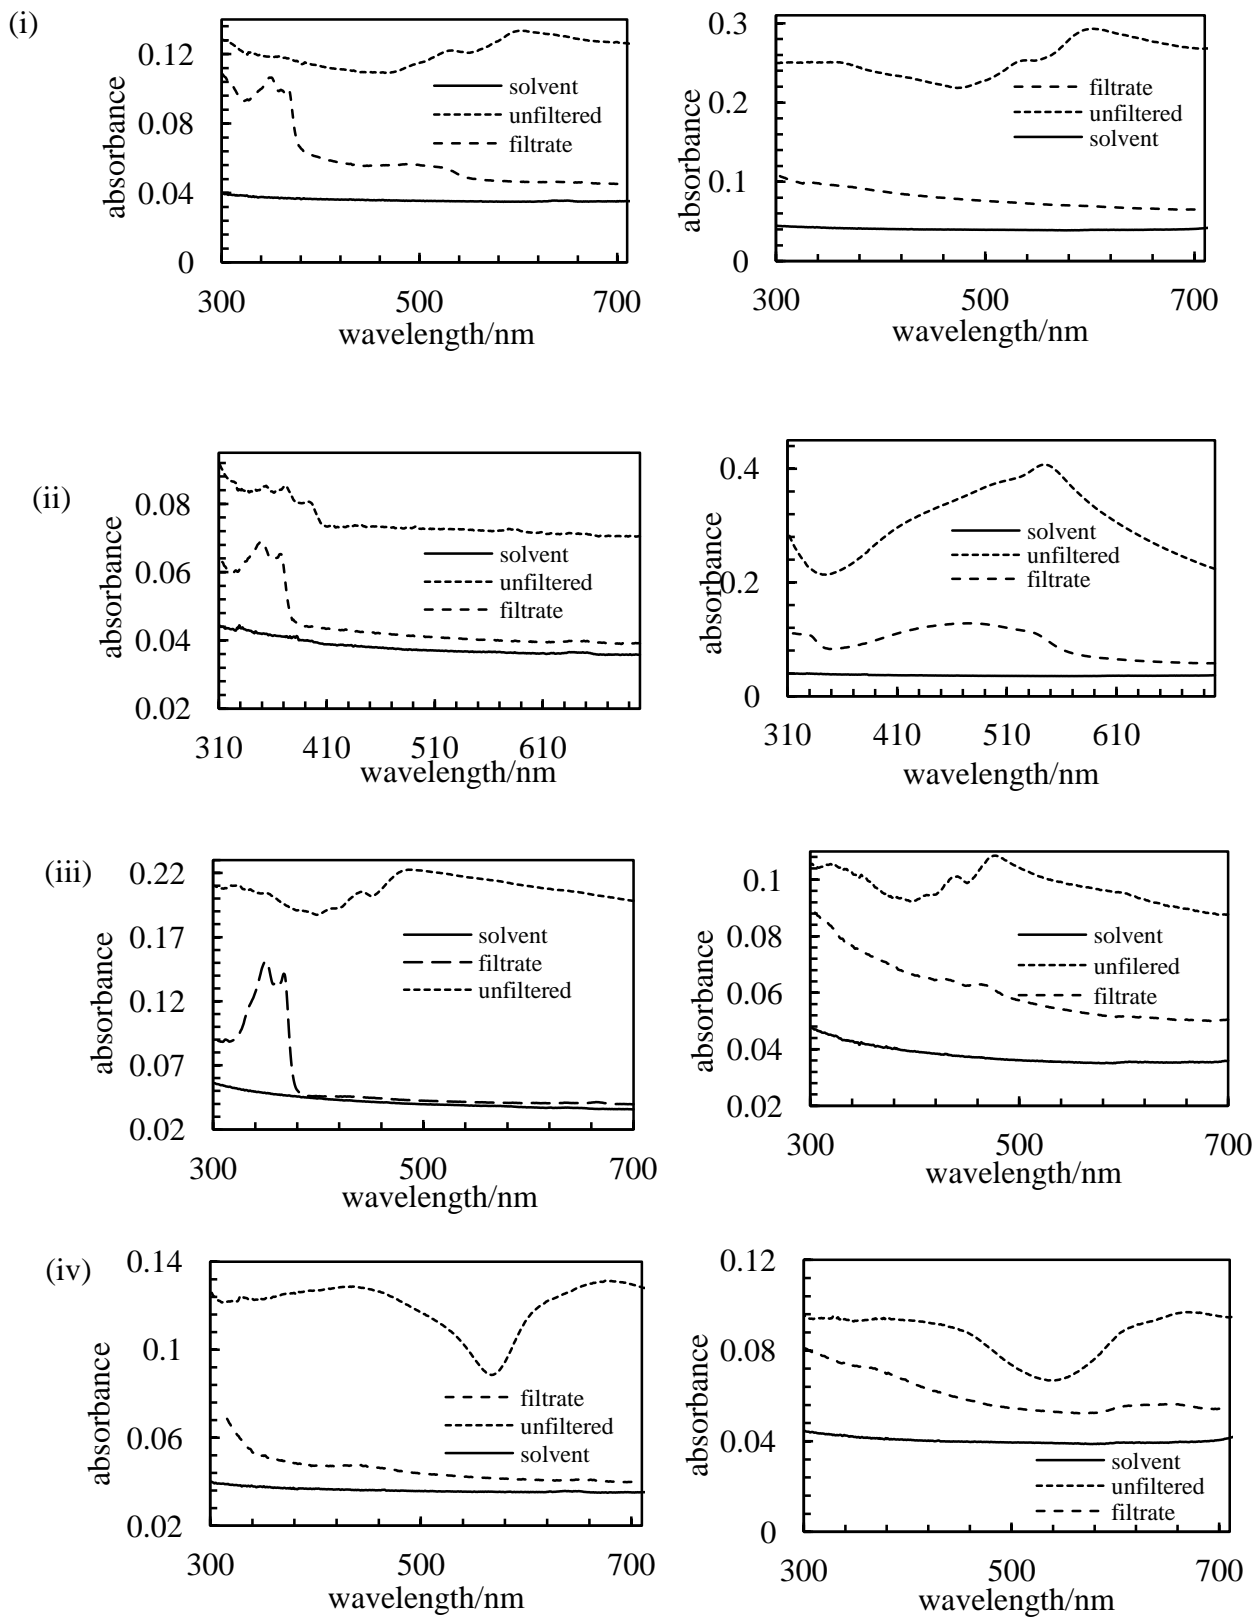



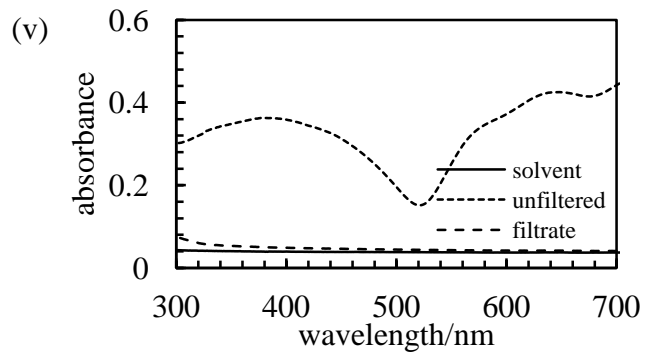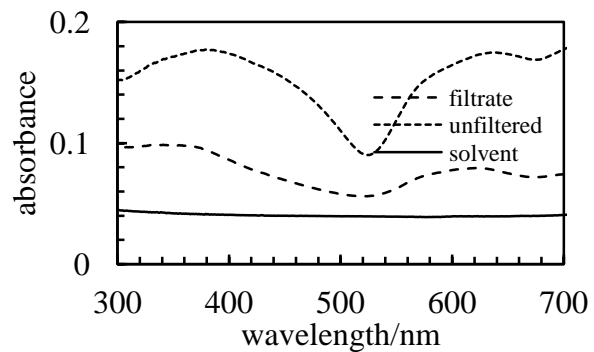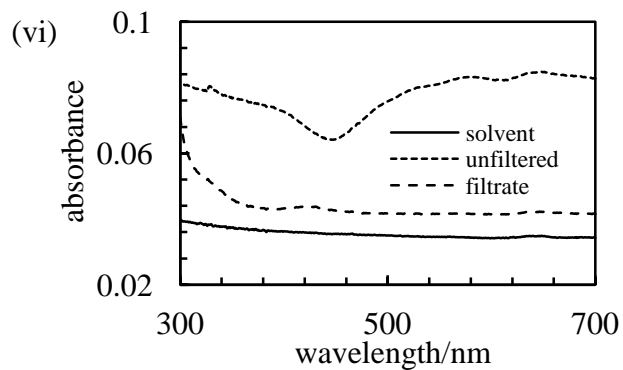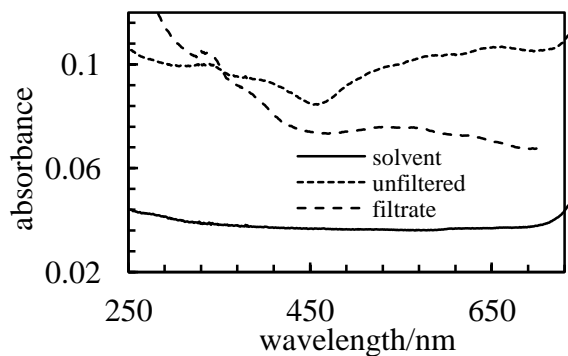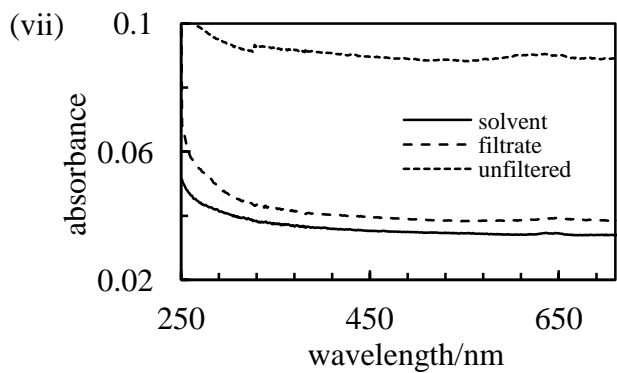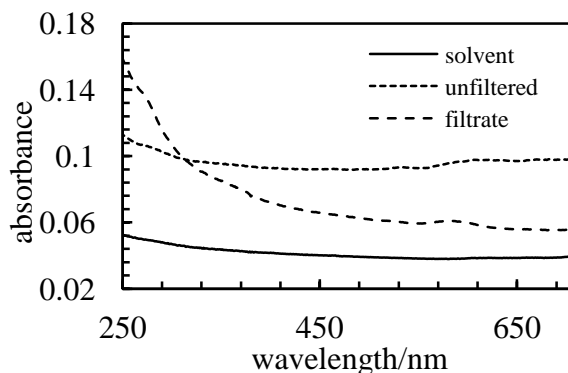

**Figure S5.** Graph of absorbance against concentration for dispersions of the seven pigments in *n*-heptane (left column) or water (right column) for (i) PR, (ii) PO, (iii) PY, (iv) PG, (v) PB, (vi) PI and (vii) PV.

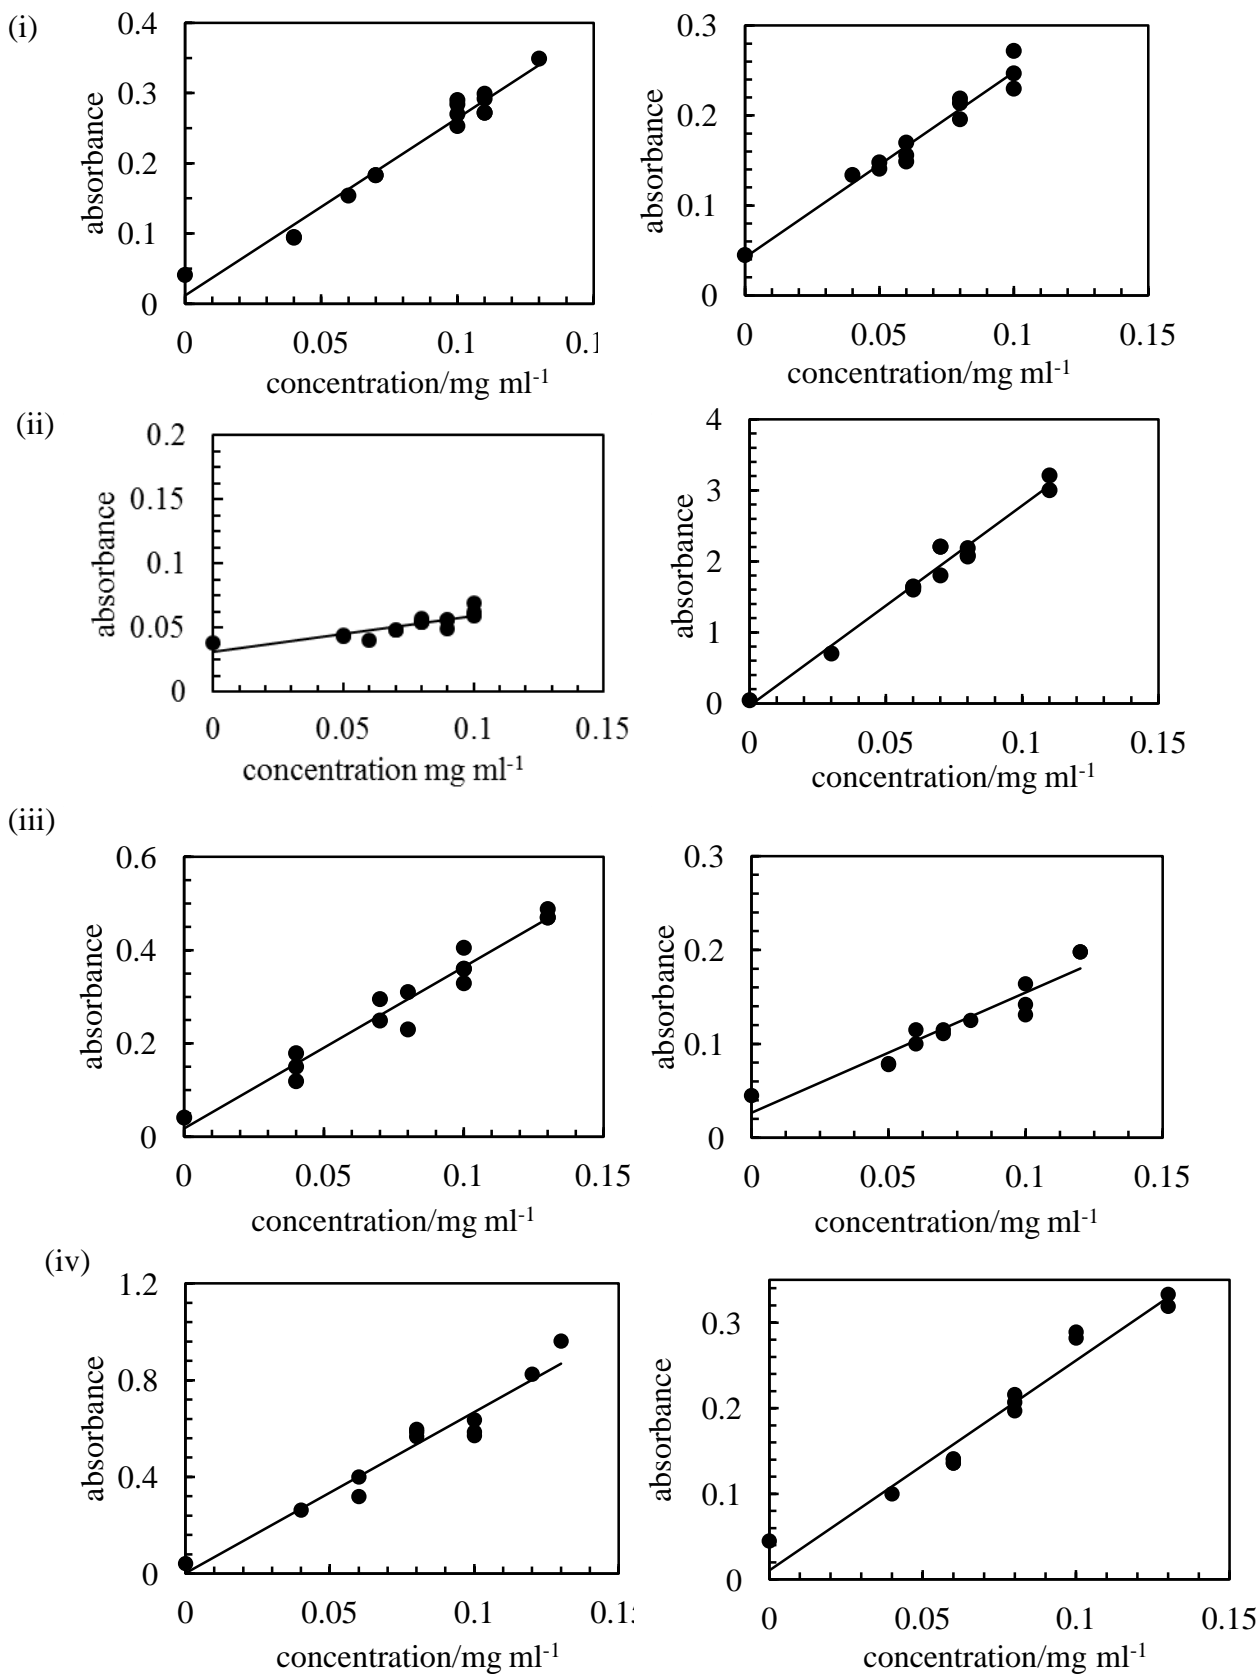

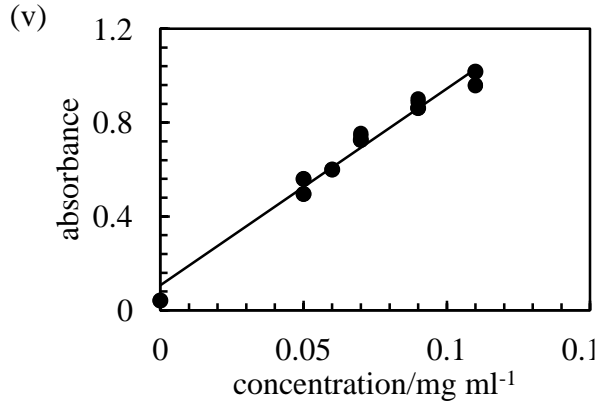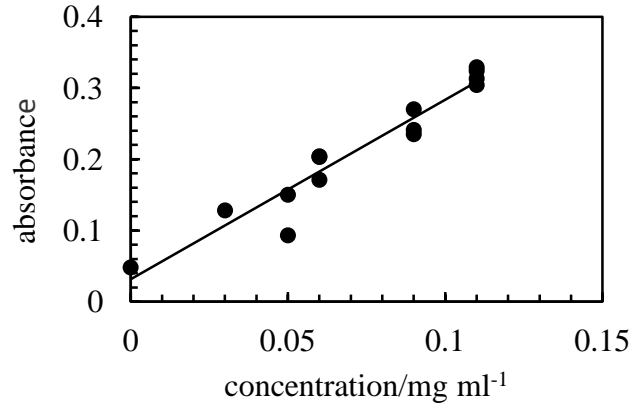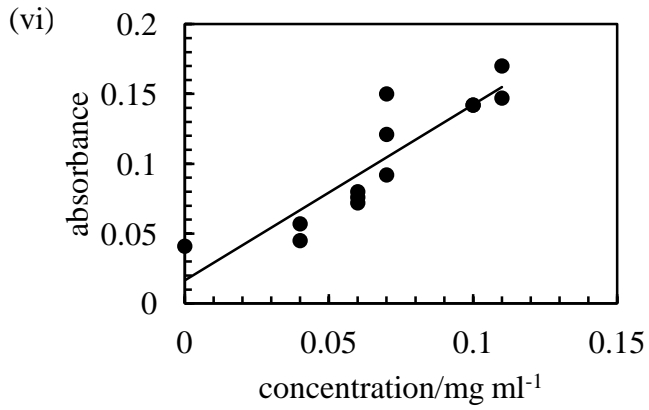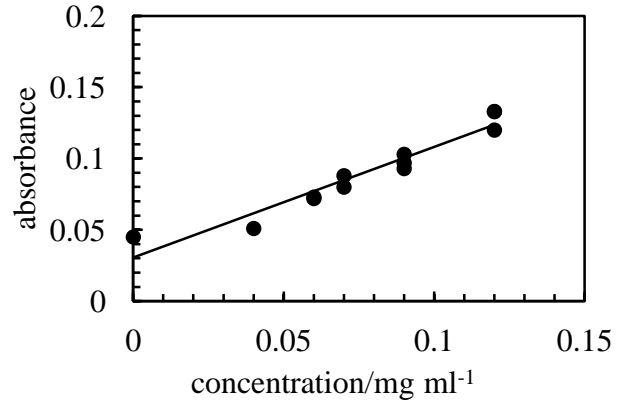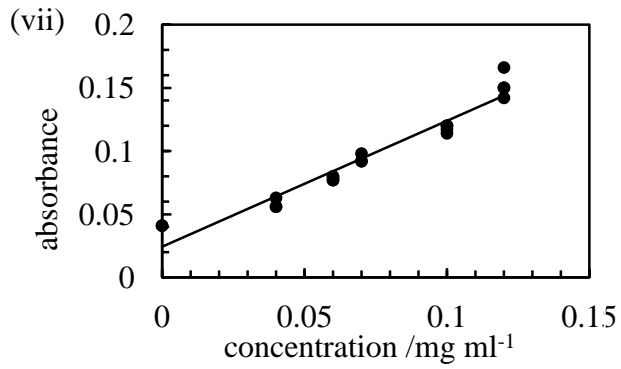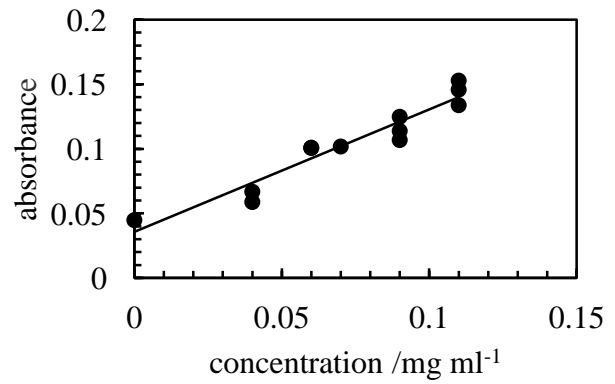

**Figure S6.** Fraction of (a) oil and (b) water resolved as a function of time for *n*-heptane-water emulsions stabilized by 1 wt.% of the different pigments at  $\phi_w = 0.5$ .

(a)

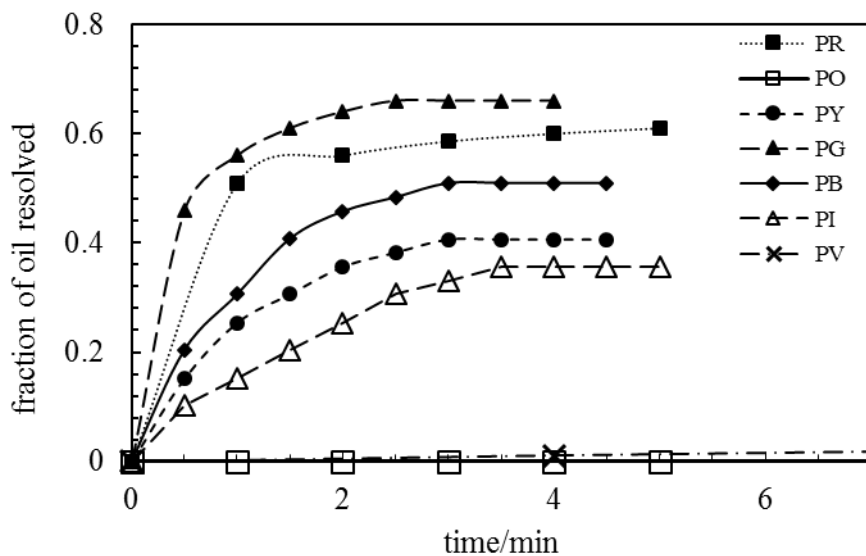

(b)

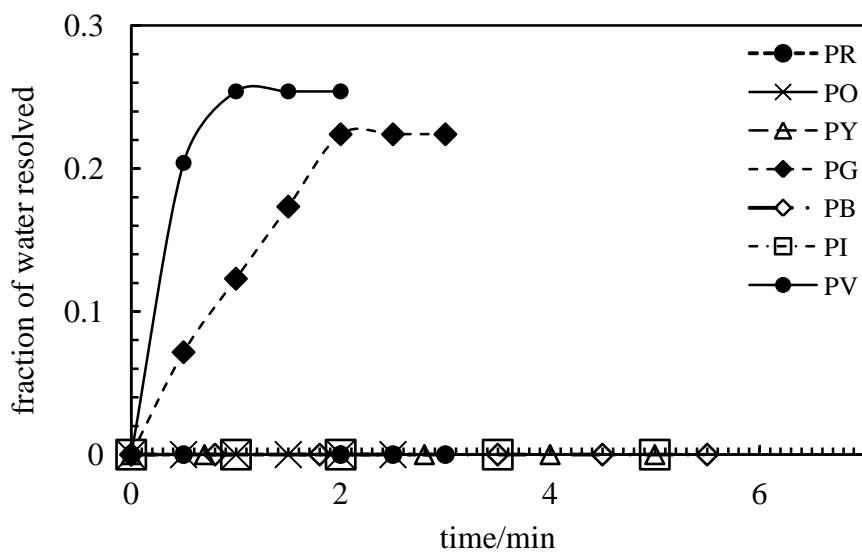

**Figure S7.** Optical micrographs of fresh emulsions  $\phi_w = 0.5$  stabilized by the seven pigments at different particle concentrations for (a) PR, (b) PO, (c) PY, (d) PG, (e) PB, (f) PI, (g) PV.

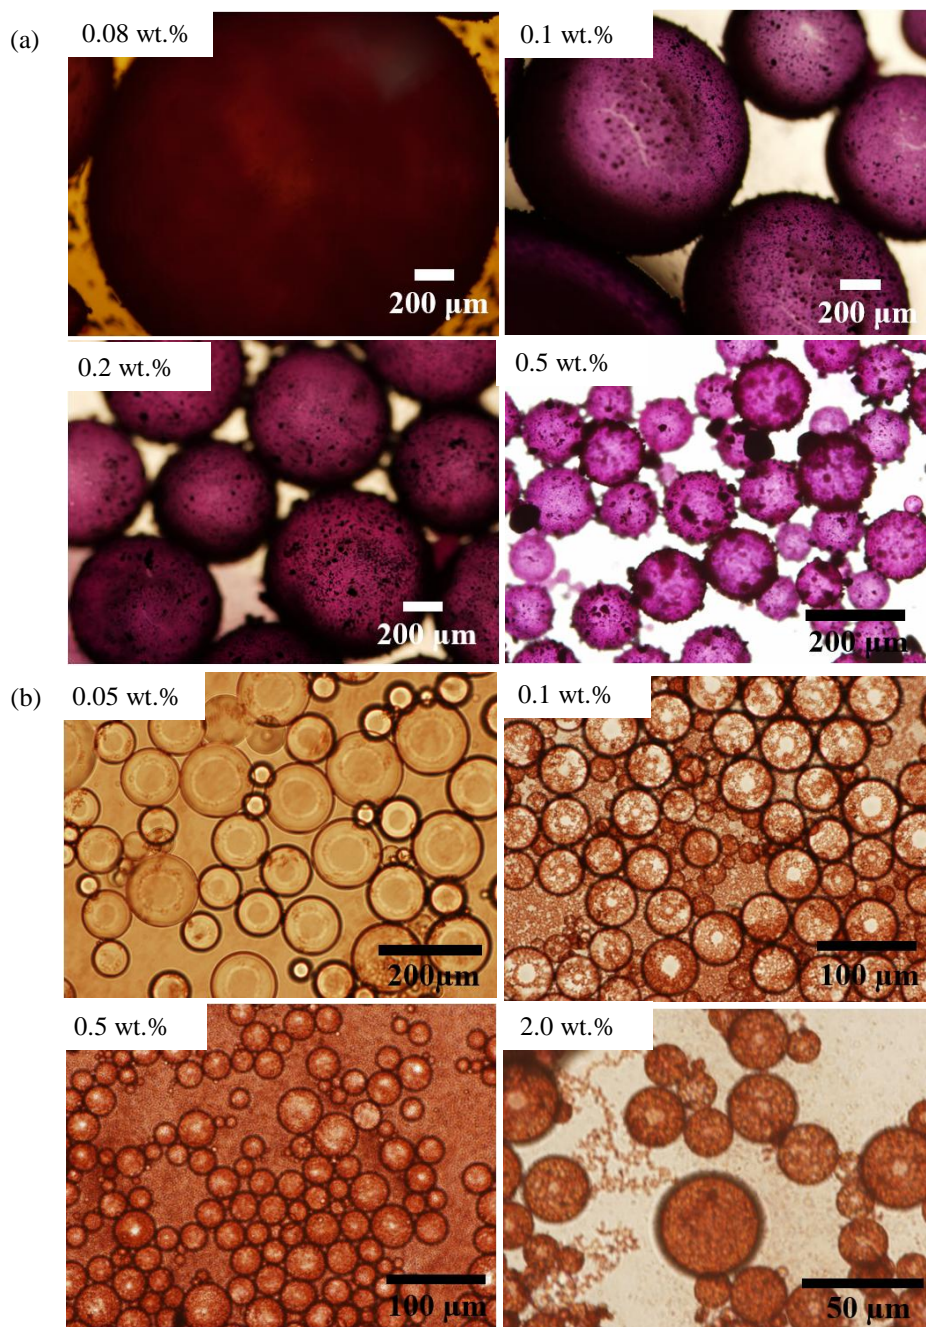

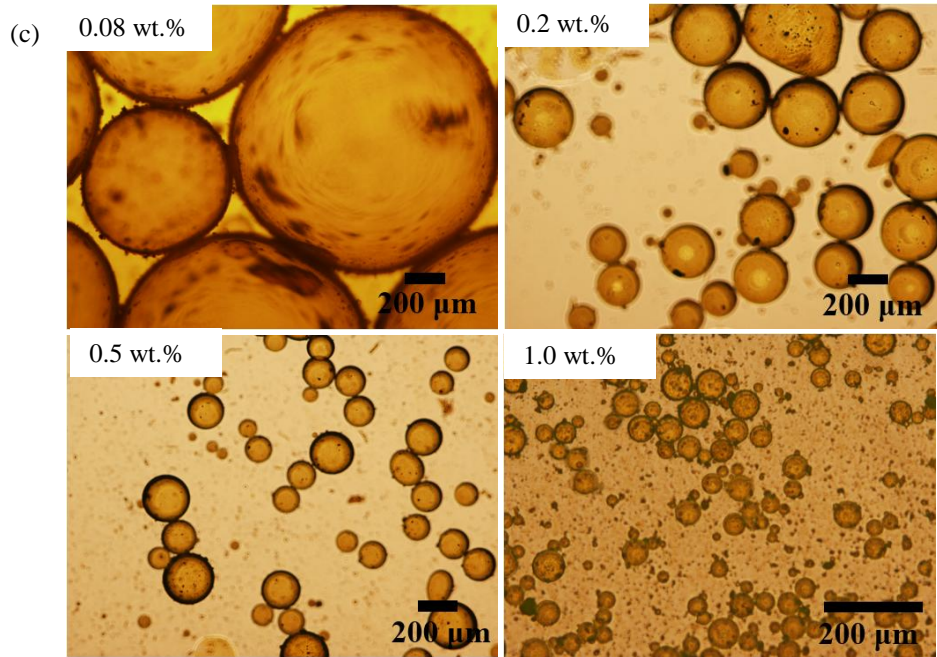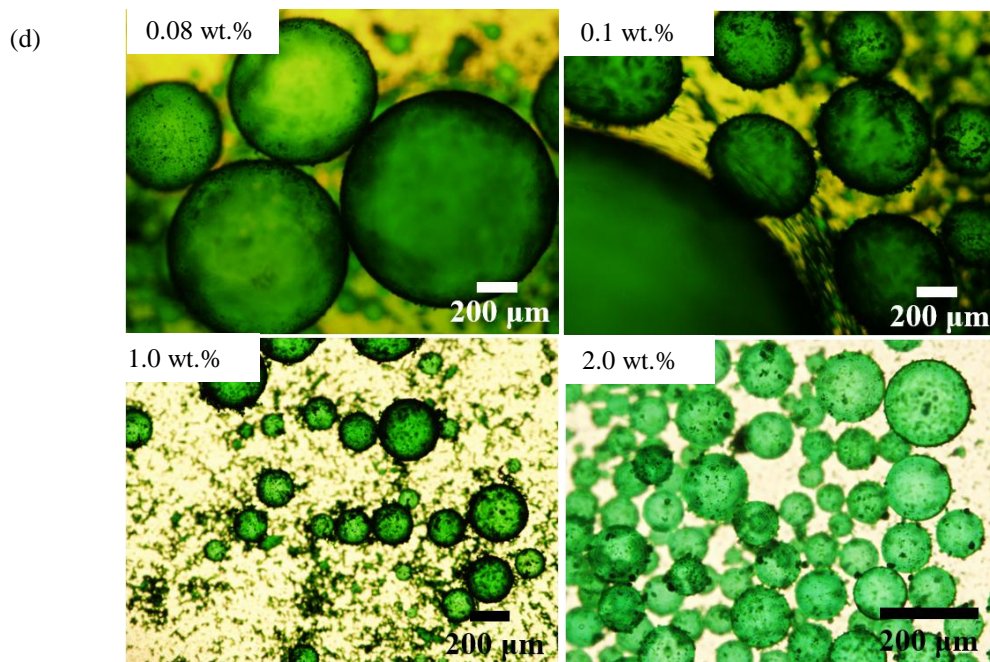

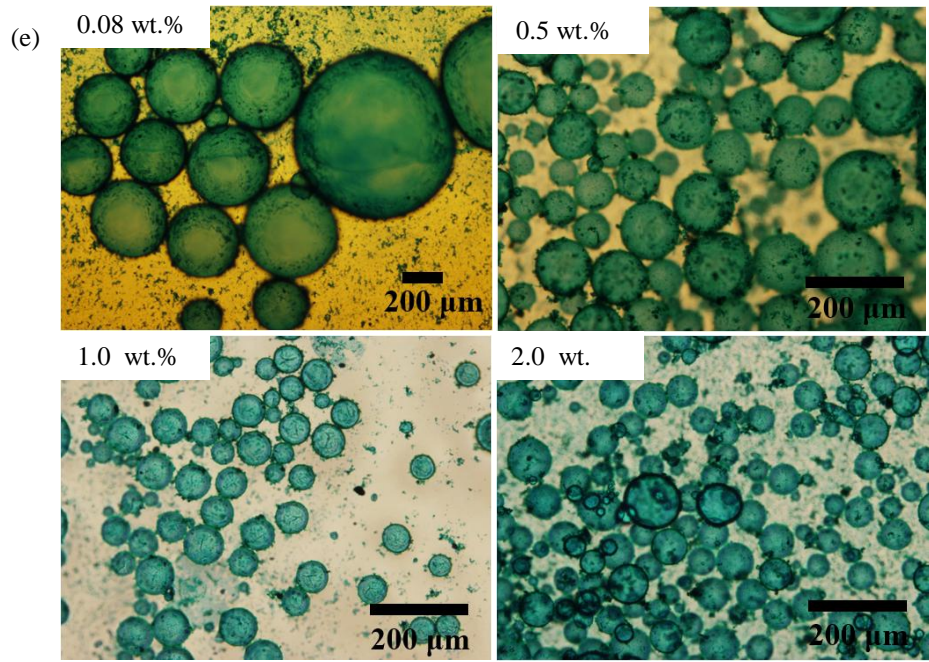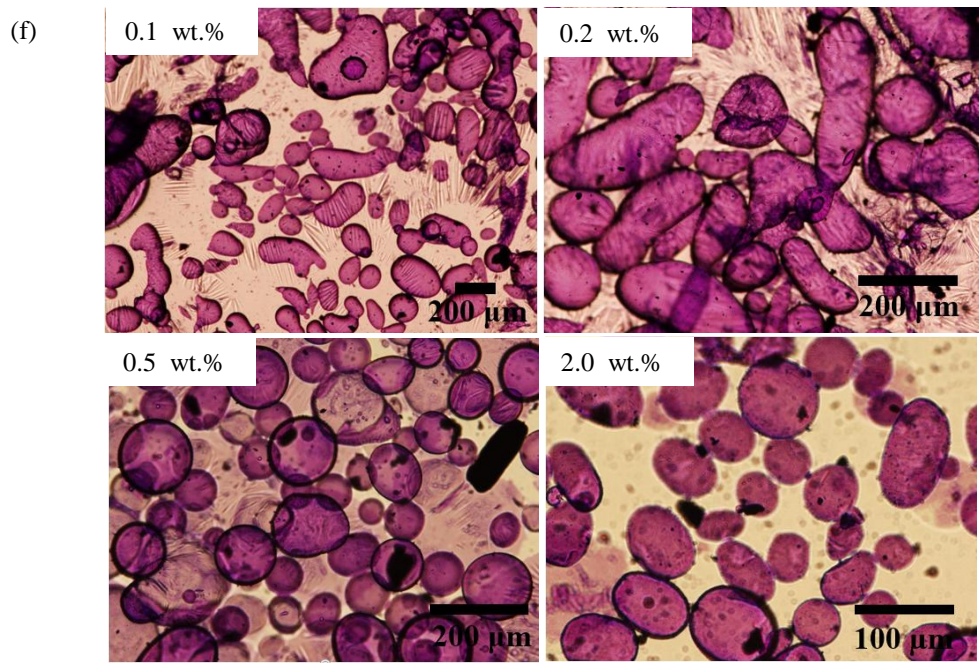

(g)

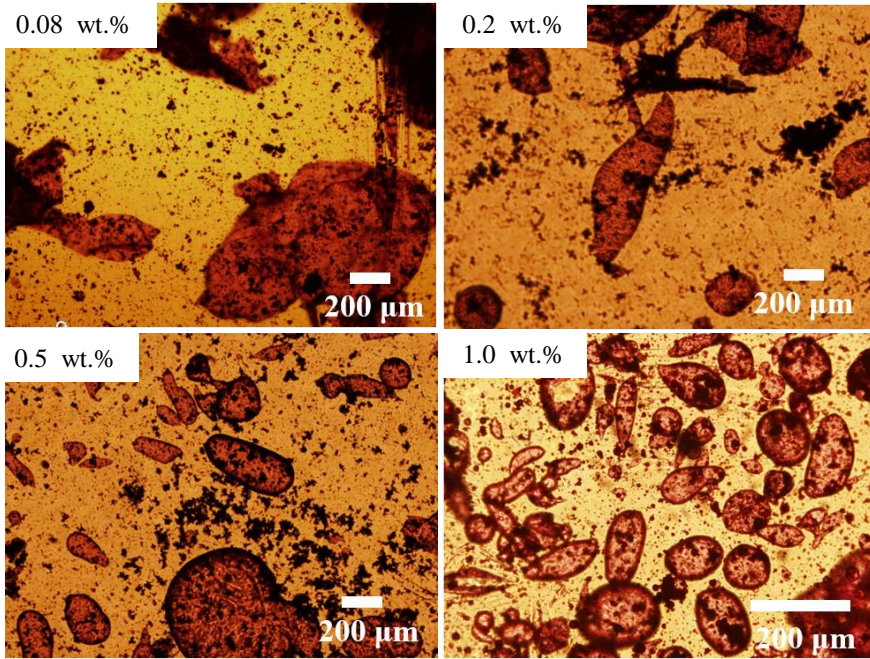



**Figure S8.** Variation of emulsion conductivity as a function of water volume fraction for 1 wt.% pigment-stabilized emulsions for (a) PR, (b) PY, (c) PB, (d) PI. Vertical dotted line signifies phase inversion.

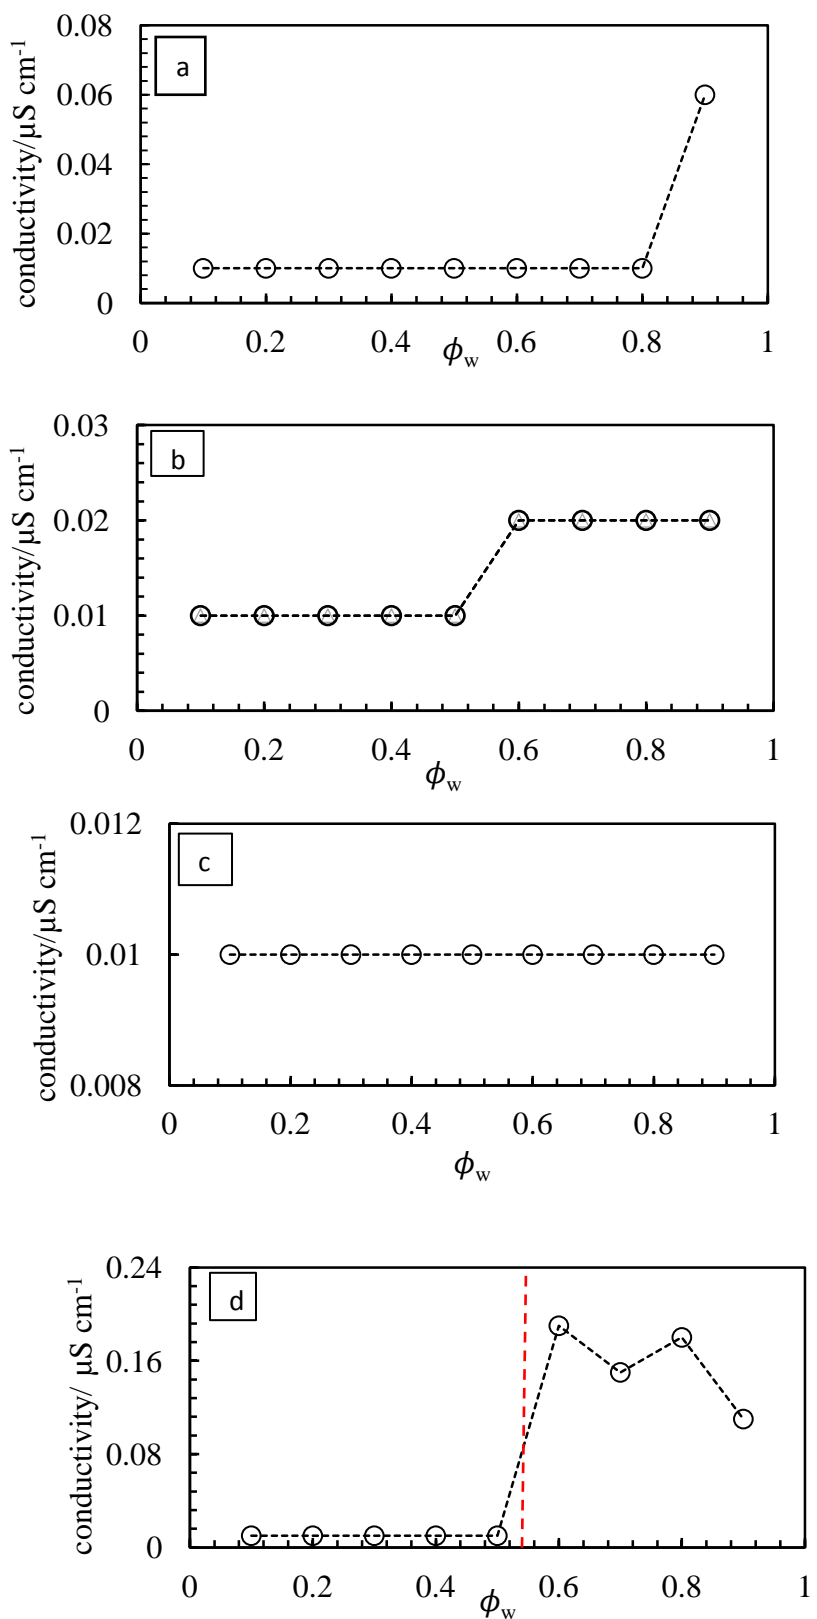

**Figure S9.** Variation of fraction of oil (filled points) and water (open points) resolved as a function of initial water volume fraction two months after preparation for emulsions stabilized by (a) PR, (b) PY, (c) PB, (d) PI.

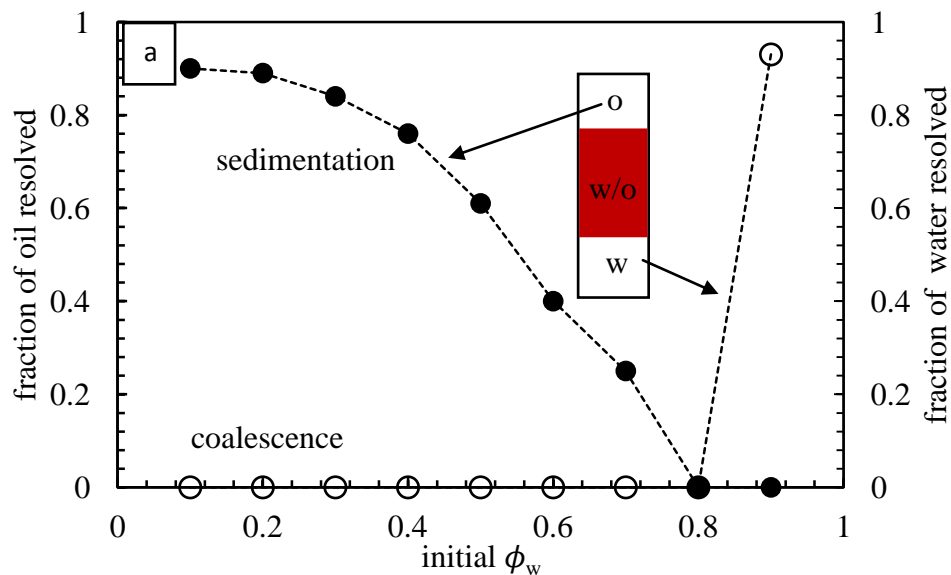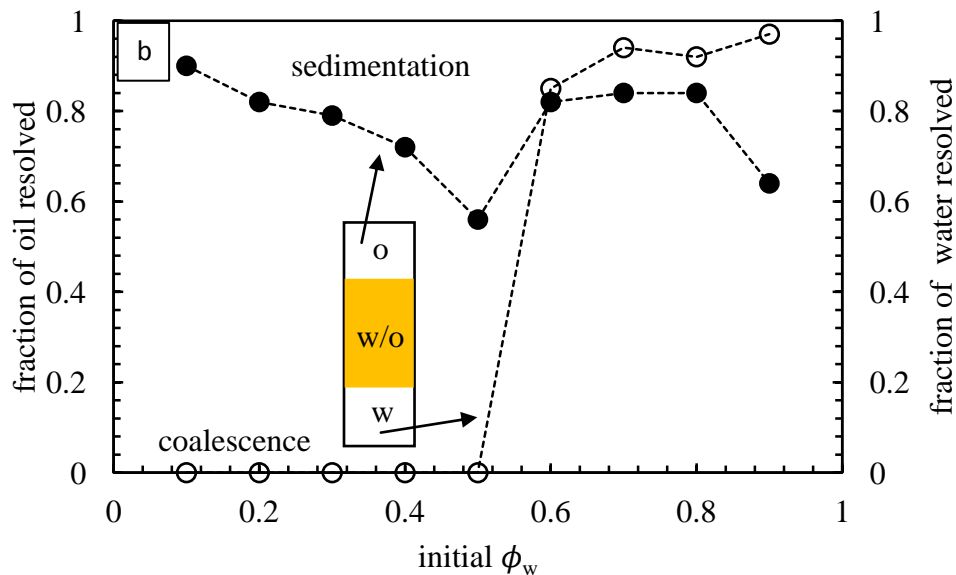

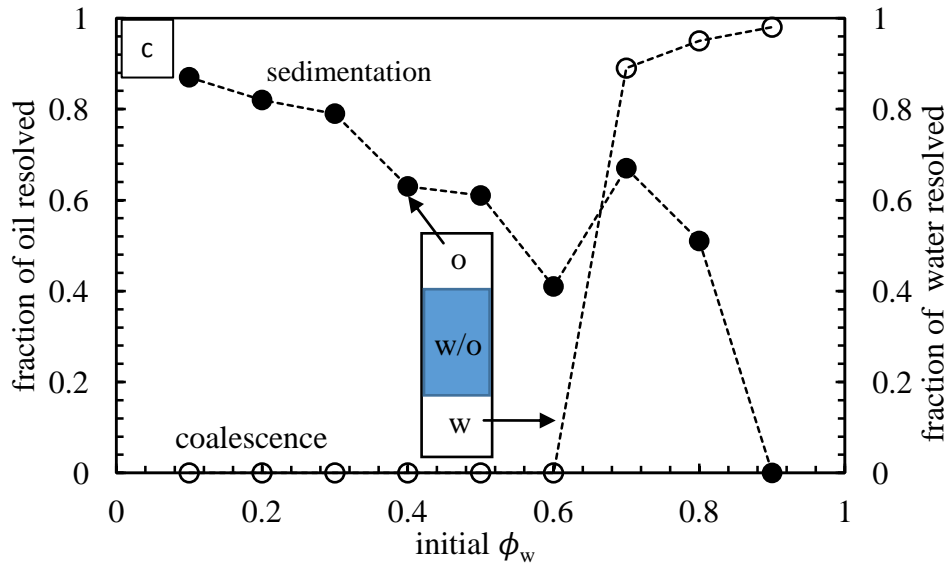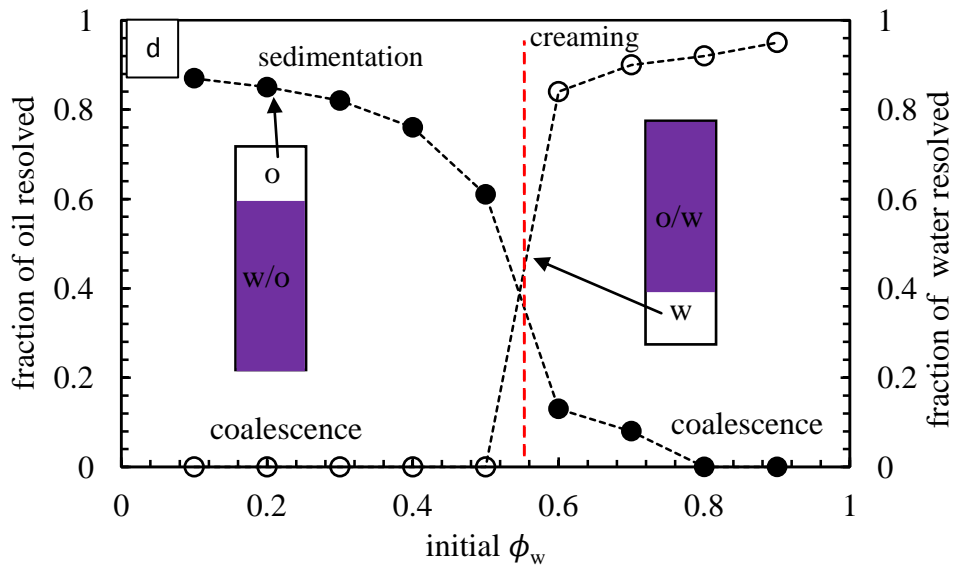

**Figure S10.** Optical micrographs of emulsions of Figure S8 after 20 min at different water volume fractions (given) for (a) PR, (b) PO, (c) PY, (d) PG, (e) PB, (f) PI, (g) PV.

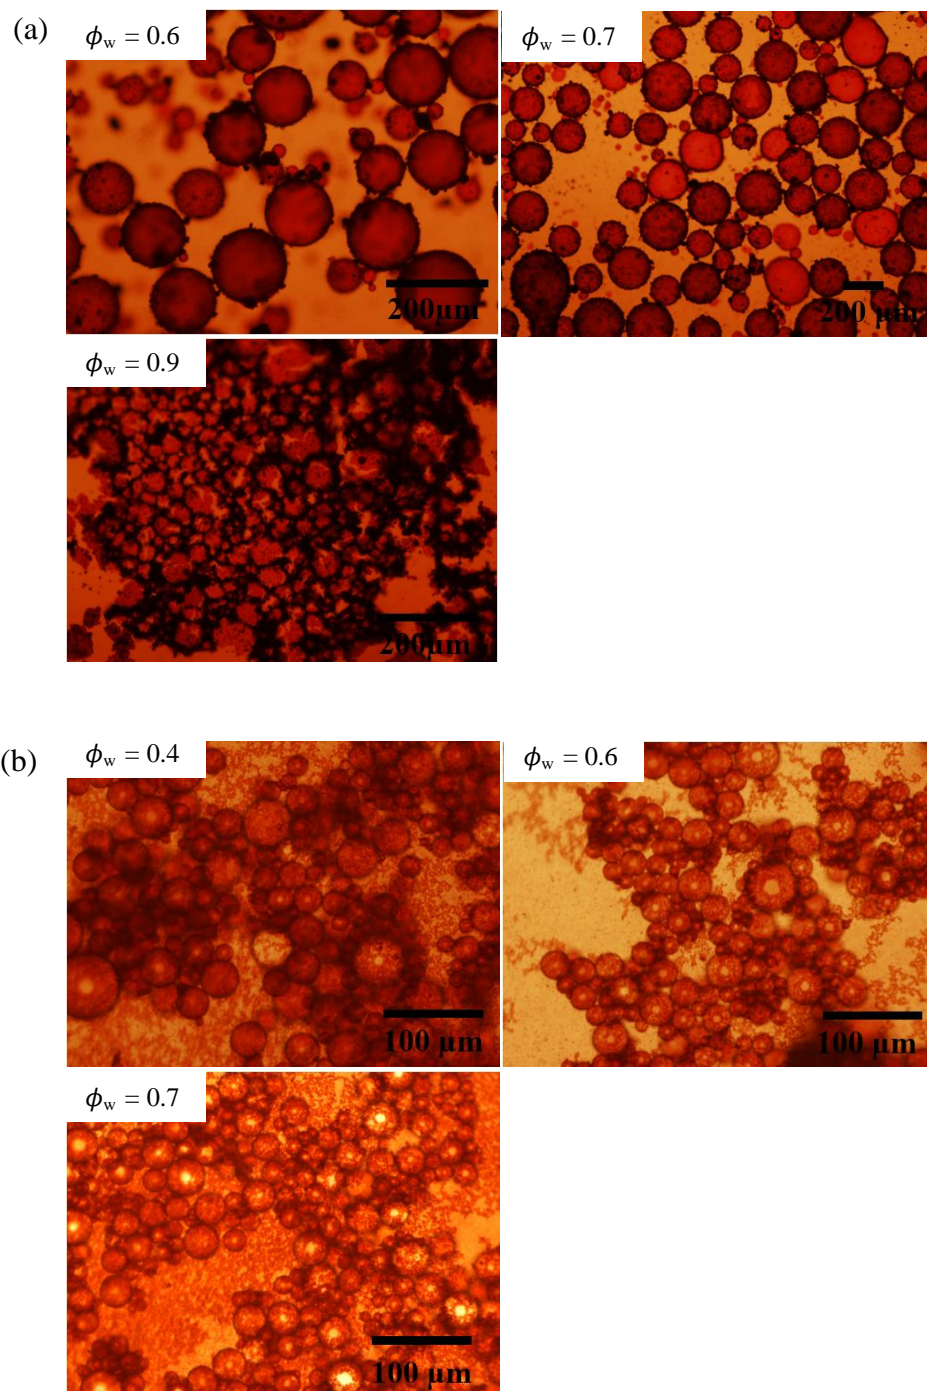

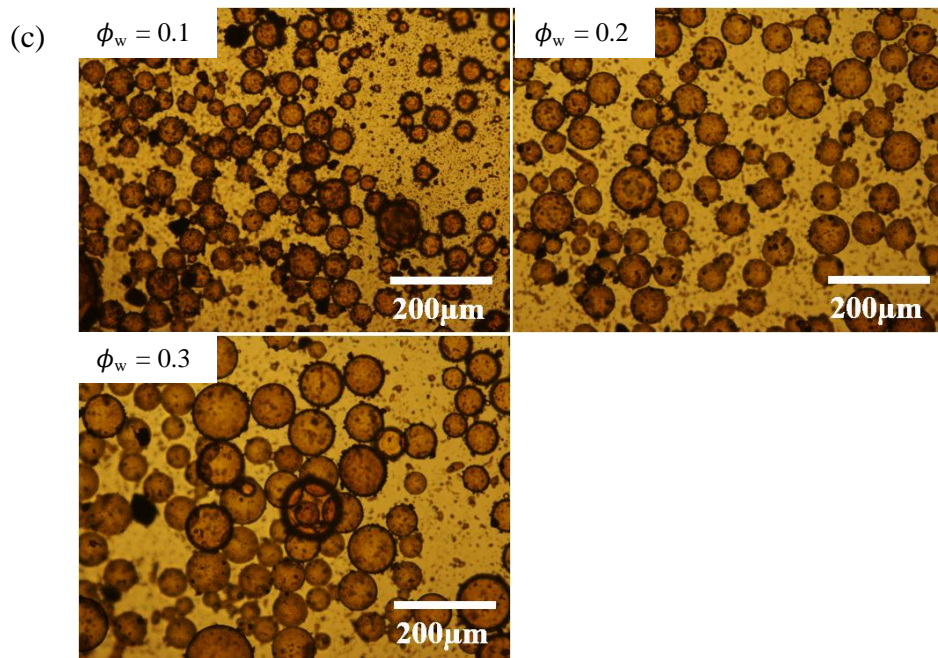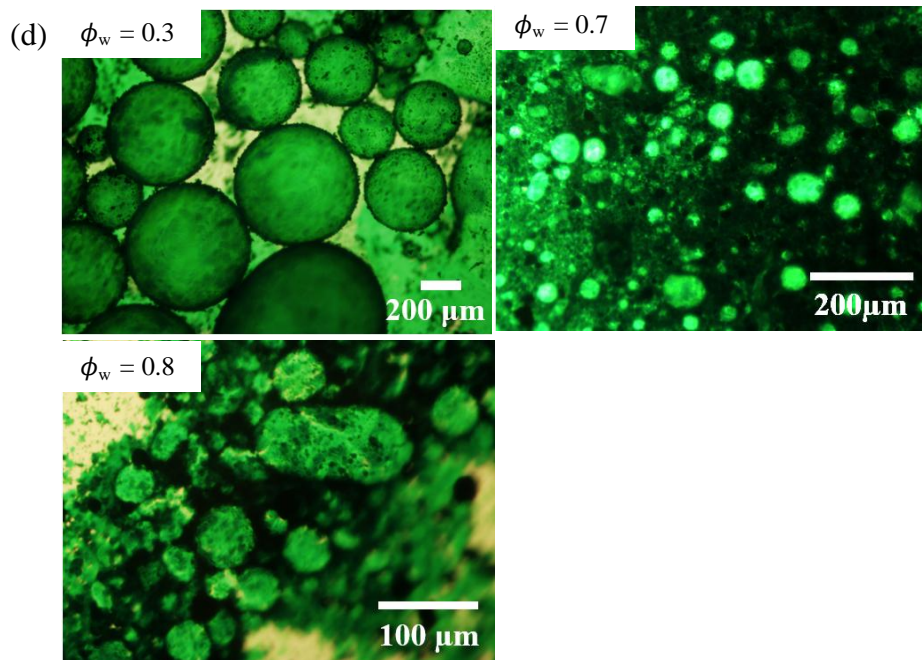

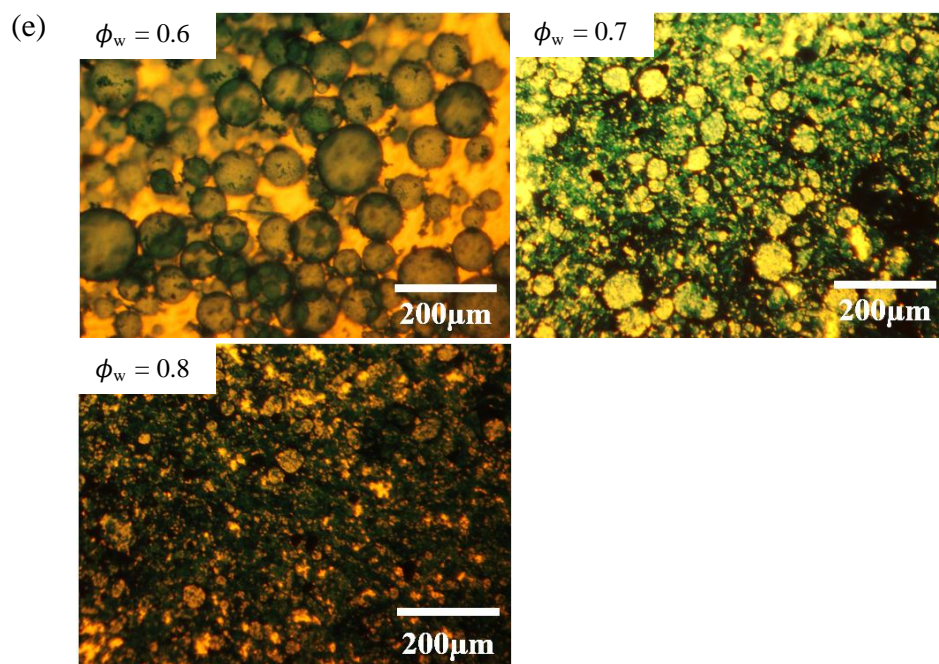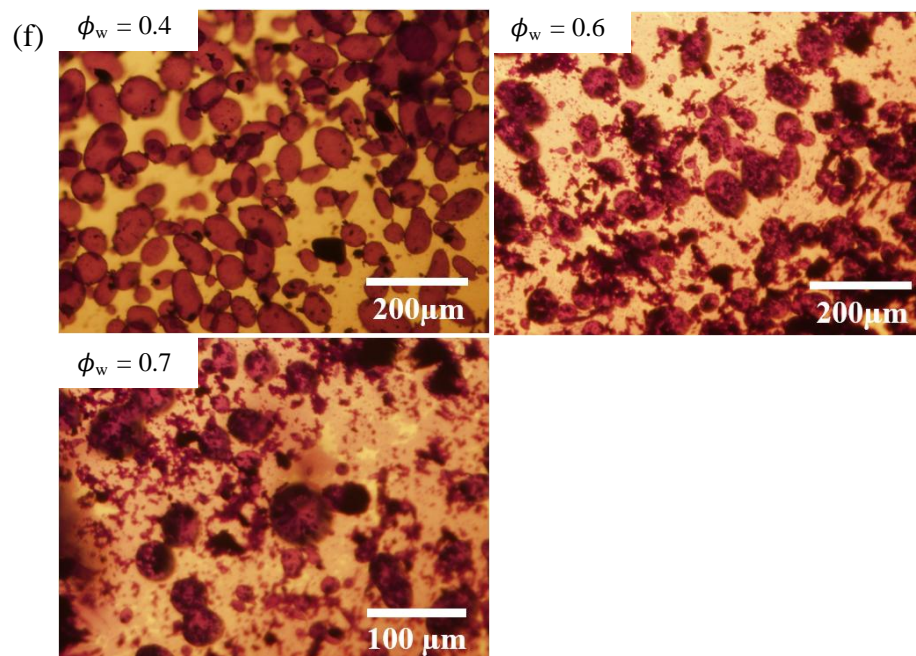

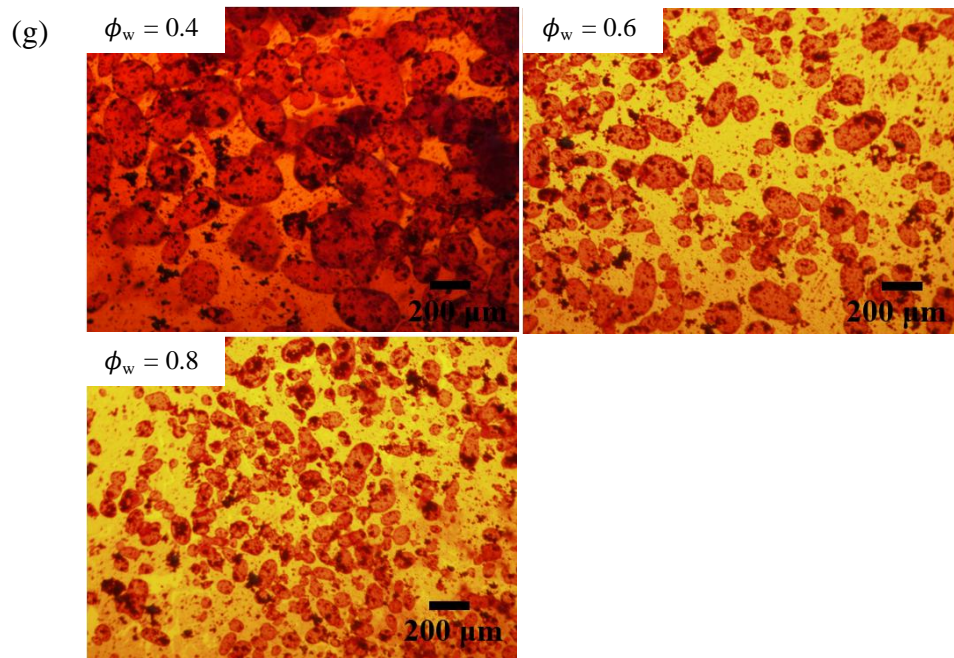

**Figure S11.** Variation of drop diameter with aqueous volume fraction for emulsions stabilised by 1 wt.% of pigment for (a) PR, (b) PY (c) PB, (d) PI.

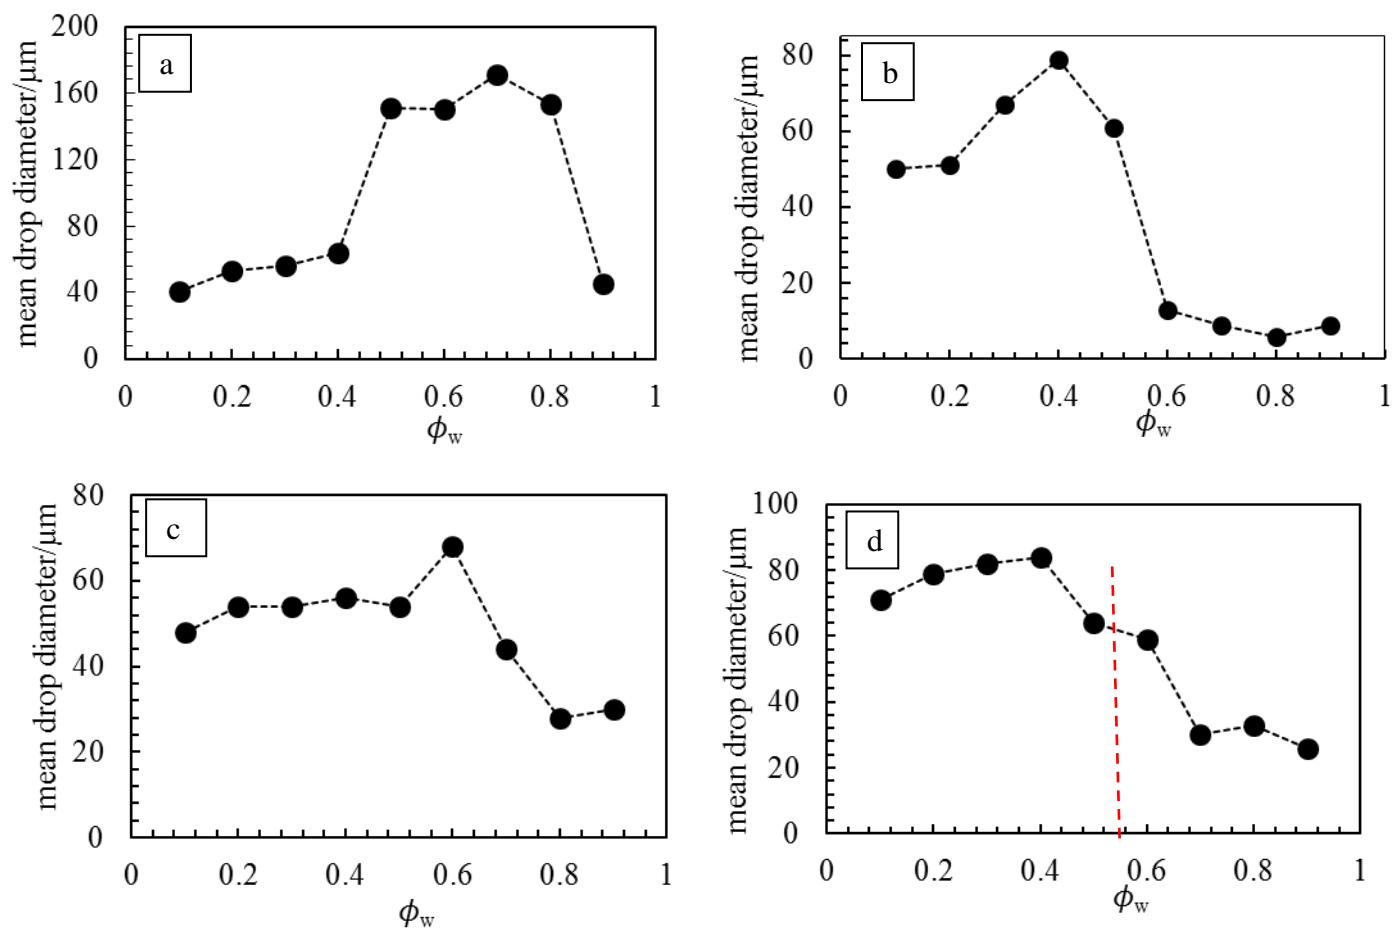

Supplement: SC-008-C6SC03085H-s001.pdf [file SC-008-C6SC03085H-s001.pdf]
